# Supplementary material for: WDR5 supports colon cancer cells by promoting methylation of H3K4 and suppressing DNA damage
Source: PubMed Central journal article supplement (PMC6011590; doi:10.1186/s12885-018-4580-6), 2018-06-20
Supplement: 12885_2018_4580_MOESM1_ESM.pdf [file 12885_2018_4580_MOESM1_ESM.pdf]

Additional File 1.pdf includes:

Table S1: Frequency of KMT2/MLL Mutations in Colon Cancer Cell Lines

Table S2: Sequences of individual siRNA and shRNA duplexes

Table S3: Sequences of qPCR primers

Figure S1: Validation of four oligos used for RNAi-mediated WDR5 depletion

Figure S2: Drug dose response curve for OICR-9429 in HCT116 cells

Figure S3: Representative propidium iodide cell cycle analysis following WDR5 depletion or OICR-9429 treatment in three colon cancer cell lines

Figure S4: Evaluation of apoptosis via Annexin V/PI staining following WDR5 depletion or OICR-9429 treatment in three colon cancer cell lines

Figure S5: RBBP5 depletion does not affect cell viability in a panel of colon cancer cell lines

| Cell Line | KMT2A                                                               | KMT2B                                                                                     | KMT2C                                          | KMT2D                                                                                                                                                                                                                                        | KMT2F               | KMT2G                                    | WDR5                 |
|-----------|---------------------------------------------------------------------|-------------------------------------------------------------------------------------------|------------------------------------------------|----------------------------------------------------------------------------------------------------------------------------------------------------------------------------------------------------------------------------------------------|---------------------|------------------------------------------|----------------------|
| HCT116    |                                                                     | D550fs <sup>2</sup><br>G1881fs <sup>1</sup><br>L2136fs <sup>2</sup>                       | Q419R <sup>1</sup><br>I1344fs <sup>1,2</sup>   | V160M <sup>2</sup><br>R2173fs <sup>1</sup><br>R2443fs <sup>1,2</sup>                                                                                                                                                                         |                     | G1578fs <sup>2</sup>                     | Y260H <sup>1,2</sup> |
| HCT15     | T771fs <sup>2</sup><br>S1062Y <sup>1,2</sup><br>V2178A <sup>1</sup> | R226W <sup>2</sup><br>R1125H <sup>2</sup><br>A1989T <sup>2</sup>                          | G3438D <sup>1,2</sup><br>S3543N <sup>1,2</sup> | P1152H <sup>2</sup><br>E1244D <sup>1</sup><br>E1517D <sup>1,2</sup><br>P1931H <sup>2</sup>                                                                                                                                                   |                     | D159N <sup>2</sup><br>Q780H <sup>2</sup> |                      |
| SW480     |                                                                     |                                                                                           |                                                | D1633N <sup>2</sup>                                                                                                                                                                                                                          |                     |                                          |                      |
| SW620     |                                                                     | G273S <sup>2</sup><br>G292V <sup>1,2</sup>                                                |                                                |                                                                                                                                                                                                                                              |                     |                                          |                      |
| RKO       | T771fs <sup>2</sup><br>S873fs <sup>2</sup><br>D877fs <sup>1</sup>   | A905T <sup>2</sup><br>R1579H <sup>2</sup><br>D1819fs <sup>2</sup><br>P1823fs <sup>1</sup> | G2636C <sup>1</sup><br>R3853W <sup>2</sup>     | R916H <sup>1</sup><br>R1189H <sup>1,2</sup><br>L1327P <sup>1</sup><br>L1600P <sup>1,2</sup><br>G1960fs <sup>2</sup><br>P2550fs <sup>2</sup><br>G3465* <sup>1,2</sup><br>L4516P <sup>1</sup><br>R4964fs <sup>2</sup><br>L5056P <sup>1,2</sup> | A1325T <sup>2</sup> | T1657A <sup>2</sup>                      | V217Ins <sup>1</sup> |
| LoVo      |                                                                     | R525W <sup>1,2</sup><br>P2255L <sup>2</sup>                                               | C1013R <sup>1</sup><br>E1313K <sup>1</sup>     | H77fs <sup>1,2</sup><br>P647fs <sup>1,2</sup><br>P648fs <sup>1,2</sup><br>T3548I <sup>2</sup>                                                                                                                                                |                     | V1404I <sup>2</sup>                      | G277D <sup>1,2</sup> |
| T84       |                                                                     |                                                                                           |                                                | None <sup>1,2</sup>                                                                                                                                                                                                                          |                     |                                          |                      |

**Table S1: Frequency of KMT2/MLL Mutations in Colon Cancer Cell Lines**

<sup>1</sup>=COSMIC

<sup>2</sup>=Mouradov *et al*

Note: SW480 were not evaluated in COSMIC

| Target              | Item #    | siRNA | Target Sequence      |
|---------------------|-----------|-------|----------------------|
| Human WDR5          | L-013383  | 5     | GACGAAAGCGUGAGGAUUAU |
|                     |           | 6     | GUGGAAGAGUGACUGCUAA  |
|                     |           | 7     | GACGUGAGCUCGGGCAAGU  |
|                     |           | 8     | GAUGGAUCCUUGAUAGUUU  |
| Human RBBP5         | LU-012008 | 5     | UAACACGGCAGAUCGAAUA  |
|                     |           | 6     | UAUAGAACUUCAAGGAGUA  |
|                     |           | 7     | GCAAUACCACAGCCAUUAA  |
|                     |           | 8     | GAUGGAACUUUGGAUUGUA  |
| Human Non-Targeting | D-001810  | 01    | UGGUUUACAUGUCGACUAA  |

**Table S2: Sequences of individual siRNA and shRNA duplexes**

| Target     | Accession | Amplicon Length | Exons | Tm   | F Primers 5' -> 3'    | R primer 5' -> 3'     |
|------------|-----------|-----------------|-------|------|-----------------------|-----------------------|
| Human WDR5 | NM_052821 | 135 bp          | 8-10  | 58°C | ATGCGACAGAGACCATCATAG | CGTGAGGATATGGGATGTGAA |

**Table S3: Sequences of qPCR primers**

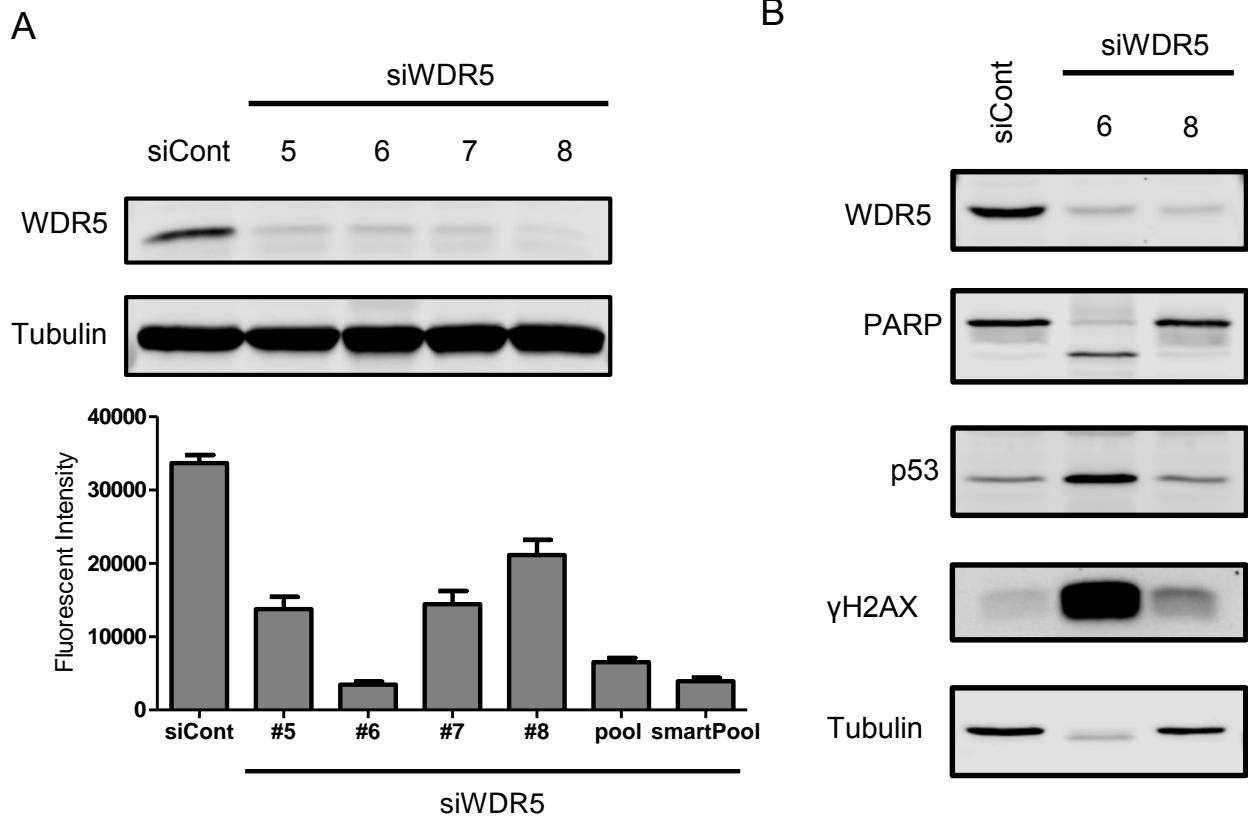

**C**

Oligo #6: GUGGAAGAGUGACUGCUAA

**Figure S1: Evaluation of individual WDR5 siRNA.** (A) Immunoblot of WDR5 and viability as measured by alamarBlue® following RNAi-mediated knockdown with individual siRNA oligos in HCT116 colon cancer cells. (B) Immunoblot of WDR5, PARP, p53, and γH2AX following RNAi-mediated WDR5 depletion using either oligo #6 or #8. (C) WDR5 #6 oligo sequence with nucleotides that match the ME1 sequence shown in red.

## HCT116

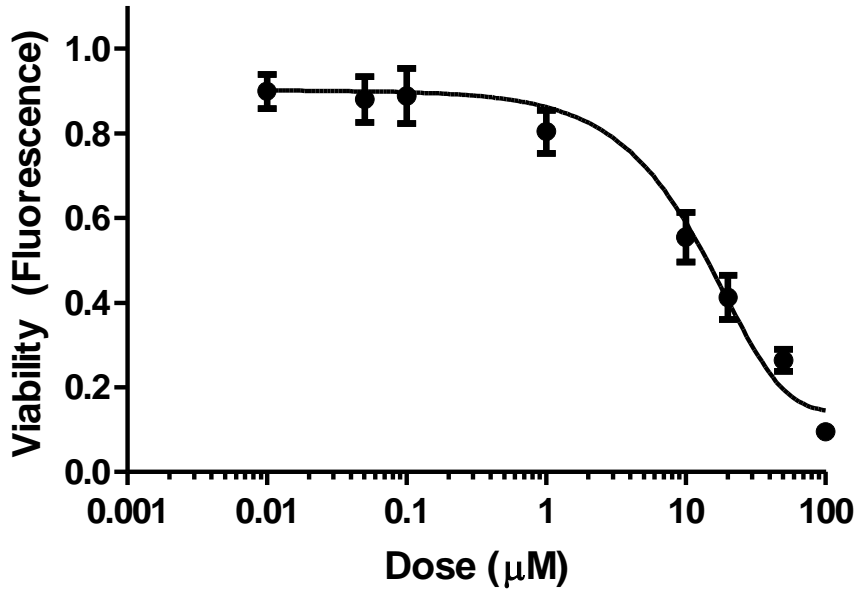

**Figure S2: Drug dose response curve for OICR-9429 in HCT116 cells.** Viability as measured by alamarBlue® following treatment with OICR-9429 at the specified doses for 48 hours in HCT116 colon cancer cells.

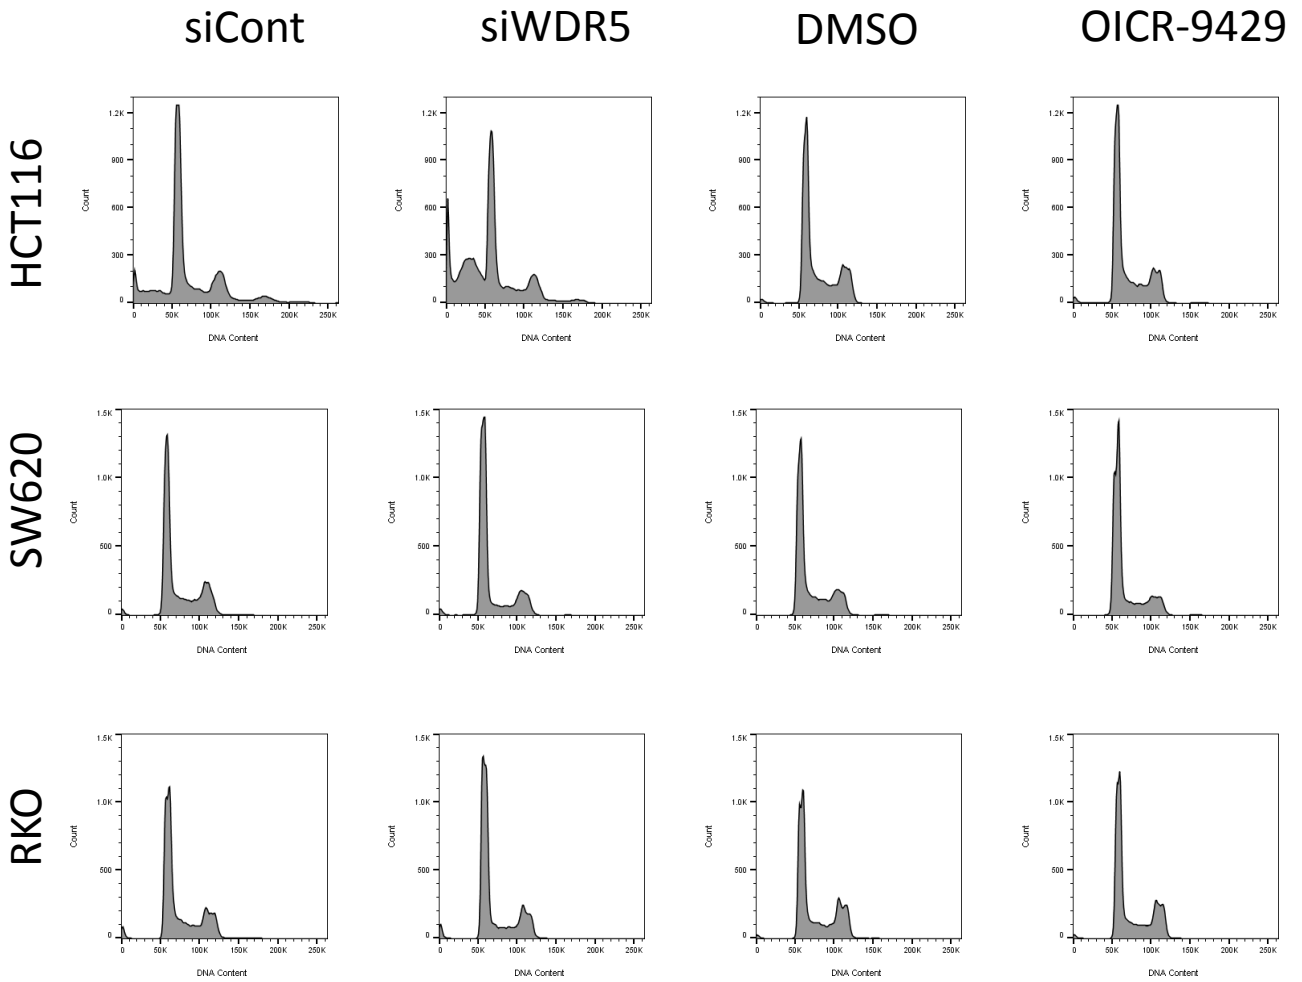

**Figure S3: Representative flow cytometry results from propidium iodide cell cycle analysis in three colon cancer cell lines following RNAi-mediated WDR5 depletion for 72 hours (left) or 10 μM OICR-9429 treatment (right) for 48 hours.**

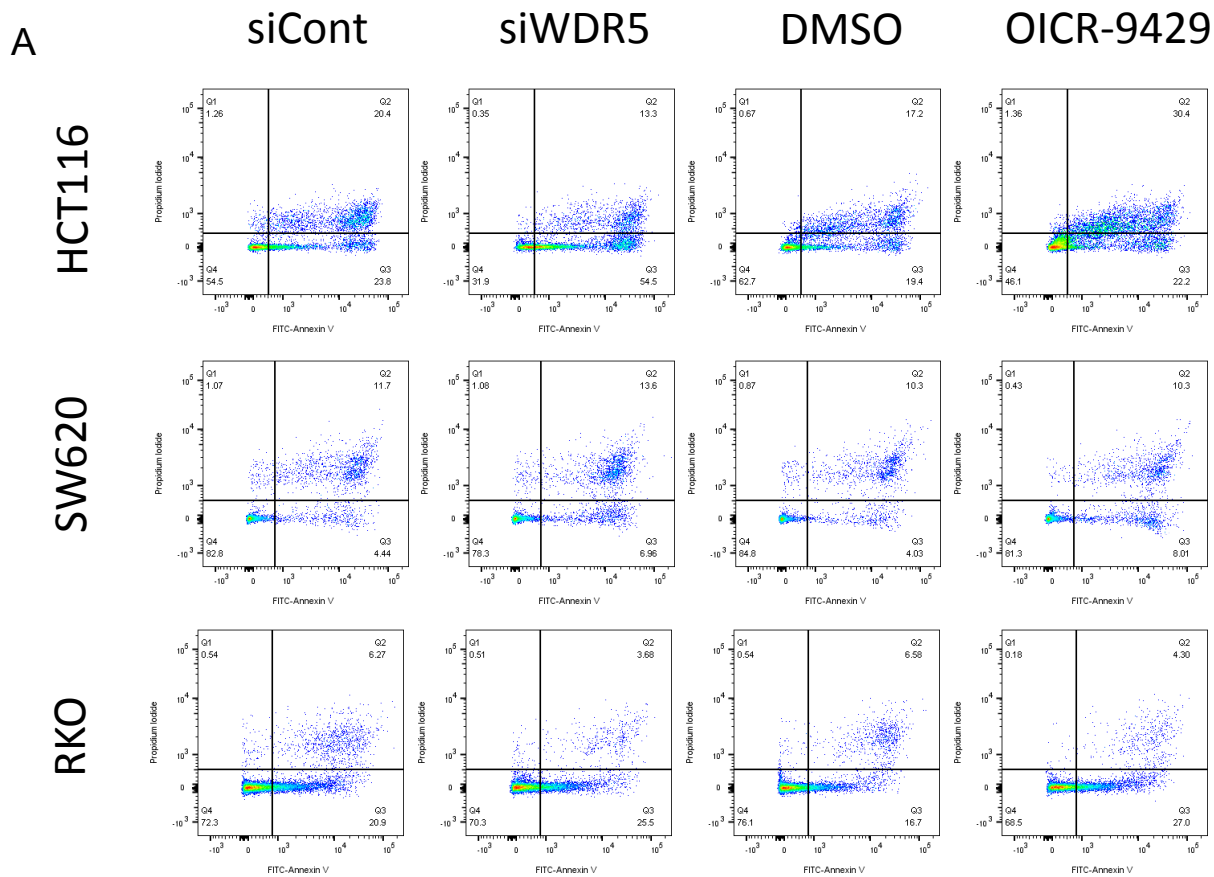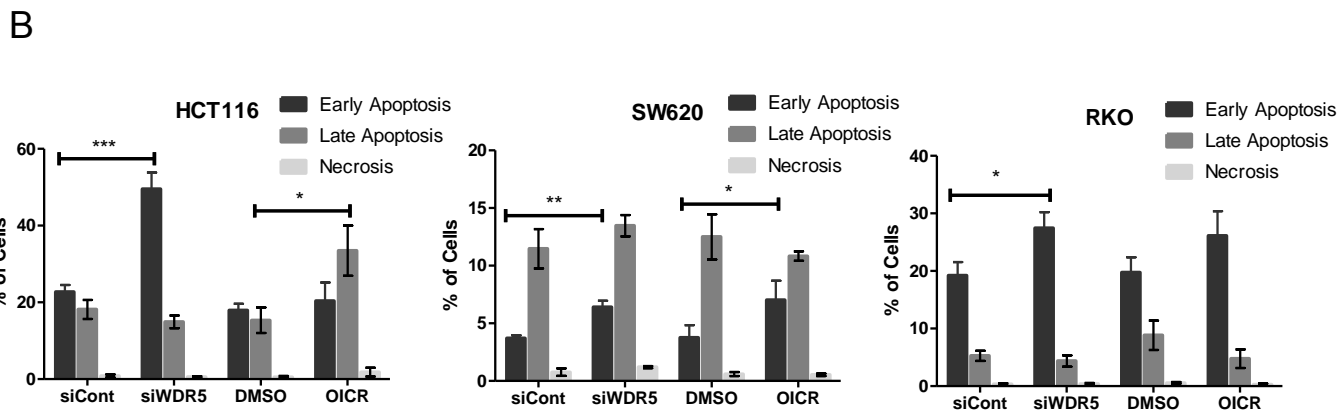

**Figure S4: Evaluation of apoptosis following WDR5 depletion for 72 hours or 10  $\mu$ M OICR-9429 treatment for 48 hours in three colon cancer cell lines. (A) Representative flow cytometry results with (B) quantification from three biological replicates in three colon cancer cell lines.**

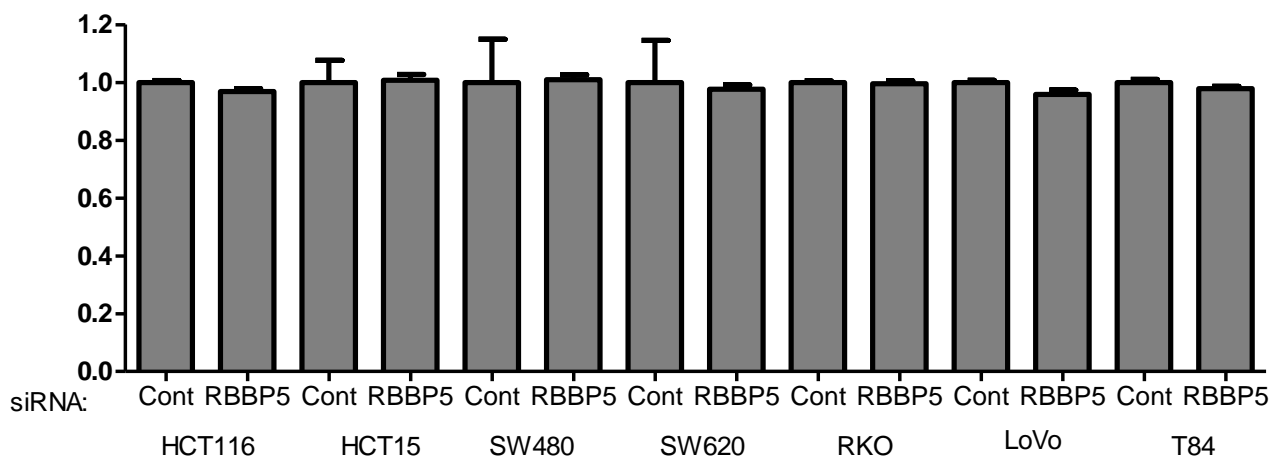

**Figure S5: RBBP5 depletion does not affect cell viability in a panel of colon cancer cell lines.** Cell viability in a panel of colon cancer cells as compared to HCECs following RNAi-mediated depletion of RBBP5. Viability was measured by alamarBlue® assays 72 hours after transfection.
